# Supplementary material for: Early identification of rapid progressive myocardial injury in Duchenne muscular dystrophy: a prospective, single-center cohort study
Source: Research Square preprint supplement (doi:10.21203/rs.3.rs-7047683/v1), 2025-10-06

Table 1 Clinical characteristics of the study populations

| Characteristic | All (n=177) | cTnI-H (n =44) | cTnI-N (n =130) | *P* value |
| --- | --- | --- | --- | --- |
| Age, years | 10.34±2.68 | 11.55±2.23 | 9.93±2.71 | <0.001*** |
| Weight, kg | 31.50(26.23, 39.08) | 32.50(29.23, 44.65) | 29.70(25.20, 37.05) | 0.011* |
| Height, cm | 131.36±14.70 | 136.96±14.80 | 129.47±14.22 | 0.002** |
| BMI, kg/m | 19.45±3.71 | 19.91±3.88 | 19.30±3.66 | 0.291 |
| Clinical symptoms (%) | 5 (2.87%) | 4 (9.09%) | 1(0.76%) | 0.02* |
| Phosphocreatine kinase, U/L | 6915(4576,10568) | 6193(4168.50, 8510.5) | 6974.5(4666, 10896) | 0.108 |
| Phosphocreatine kinase isoenzyme, ug/L | 83.92(47.24, 126.83) | 89.26(53.76, 117.34) | 82.84(44.58, 133.69) | 0.741 |
| Myoglobin, ug/L | 967.3(661.55, 1461.63) | 998.05(713.70, 1206.58) | 936.70(562.28, 1678.25) | 0.657 |
| North star ambulatory  assessment score | 18.50(6.00,28.25) | 20.00(6.25, 30.75) | 17.50(6.00, 28.00) | 0.791 |
| Abnormal ECG (%) | 62(35.03%) | 24(54.55%) | 38(29.23%) | 0.003** |
| Abnormal cardiac ultrasound (%) | 26(14.69%) | 6(13.64%) | 20(15.38%) | 0.815 |
| Abnormal CMR (%) | 121(68.36%) | 43(97.73%) | 78(60.00%) | <0.001*** |
| Corticosteroid medications (%) | 155(87.57%) | 43(97.73%) | 112(86.15%) | 0.085 |
| Cardioprotective drug usage (%) | 107(60.45%) | 39(88.64%) | 68(52.31%) | <0.001*** |
| Respiratory infection (%) | 149(84.18%) | 38(86.36%) | 111(85.38%) | 0.873 |
| Abnormal respiratory function (%) | 78(44.07%) | 20(45.45%) | 58(44.62%) | 0.664 |
| Vaccination (%) | 26(14.69%) | 2(4.55%) | 24(18.46%) | 0.025* |

BMI: body mass index, ECG: electrocardiogram, CMR: cardiac magnetic resonance. Data was described as mean±SD, median (IQR) or N(%) according to normality. * means *P*＜0.05, ** means *P*＜0.01, *** means *P*＜0.001

Table 2 The ECG between the cTnI-H and cTnI-N groups

| The ECG | cTnI-N (n =130) | cTnI-H1(n =33) | cTnI-H2 (n =7) | cTnI-H3 (n =4) | *P* value |
| --- | --- | --- | --- | --- | --- |
| Normal | 91(70.00%) | 17(51.52%) | 2(28.58%) | 2(50%) |  |
| Sinus tachycardia | 3(2.30%) | 2(6.06%) | 0 | 0 |  |
| Atrial premature beat | 1(0.77%)a | 0 | 1(14.28%)b | 0 | <0.01** |
| ventricular premature beat | 1(0.77%) | 0 | 0 | 0 |  |
| Atrioventricular hypertrophy | 2(1.54%) | 0 | 0 | 0 |  |
| Suspicious QRS wave initiation | 2(1.54%) | 0 | 0 | 0 |  |
| Ventricular preexcitation | 2(1.54%) | 0 | 0 | 0 |  |
| Right axis deviation | 0a | 2(6.06%)b | 1(14.28%)b | 1(25%)b | <0.01** |
| Short P-R interval | 0 | 1(3.03%) | 0 | 0 |  |
| ST segment change | 3(2.30%) | 2(6.06%) | 1(14.28%) | 0 |  |
| T-wave change | 3(2.30%)a | 2(6.06%) | 2(28.58%)b | 0 | <0.01** |
| High ventricular voltage | 14(10.78%) | 2(6.06%) | 0 | 0 |  |
| Q wave widening | 2(1.54%) | 0 | 0 | 0 |  |
| Abnormal Q wave | 0a | 5(15.15%)b | 0 | 1(25%)b | <0.01** |
| Incomplete right bundle branch block | 6(4.62%) | 0 | 0 | 0 |  |

ECG: electrocardiogram. Others include incomplete right bundle branch block, Normal lower limit of P-R interval, and qr type of I and avl. Comparisons among multiple groups were assessed by chi-square test for categorical data, and a post hoc Bonferroni test was performed among intra-group factors. a and b represent statistically significant differences between two groups.** means *P*＜0.01

Table 3 The CMR between the cTnI-H and cTnI-N groups

| The CMR | cTnI-N (n =130) | cTnI-H1(n =33) | cTnI-H2 (n =7) | cTnI-H3 (n =4) | *P* value |
| --- | --- | --- | --- | --- | --- |
| Normal CMR | 51(39.23%)a | 2(6.06%)b | 0 | 0 | <0.001*** |
| Elevated ECV | 24(18.46%) | 2(6.06%) | 0 | 0 |  |
| Perfusion defect | 13(10%) | 0 | 0 | 0 |  |
| Delayed reinforcement | 28(21.54%)a | 17(51.52%)b | 3(42.86%) | 2(50%) | <0.001*** |
| Delayed reinforcement and perfusion defect | 10(7.69%)a | 12(36.36%)b | 4(57.14%)b | 2(50%)b | <0.001*** |
| Cell edema | 1(0.77%) | 0 | 0 | 0 |  |
| Slightly reduced left ventricular systolic function | 2(1.54%) | 0 | 0 | 0 |  |
| Enlarged left ventricle, slightly enlarged, dense left ventricular muscle trabecula | 1(0.77%) | 0 | 0 | 0 |  |

CMR: cardiac magnetic resonance, ECV: extracellular volume. a and b represent statistically significant differences between two groups. *** means *P*＜0.001

Table 4 The cardioprotective drug between the cTnI-H and cTnI-N groups

| Cardioprotective drug usage | cTnI-N (n =130) | cTnI-H1(n =33) | cTnI-H2 (n =7) | cTnI-H3 (n =4) | *P* value |
| --- | --- | --- | --- | --- | --- |
| Unused | 61(46.92%)a | 6(18.18%)b | 0 | 0 | <0.001*** |
| One type | 47(36.15%) | 12(36.36%) | 1(14.29%) | 1(25%) |  |
| Two types | 18(13.85%) | 9(27.28%) | 3(42.85%) | 1(25%) |  |
| Three types | 4(3.08%)a | 6(18.18%)b | 2(28.57%)b | 2(25%)b | <0.001*** |
| Four types | 0b | 0 | 1(14.29%)b | 0 | <0.001*** |

a and b represent statistically significant differences between two groups. *** means *P*＜0.001

Table 5 The correlation among cardiac related indicators

| Cardiac related indicators | Phi |
| --- | --- |
| cTnI and delayed reinforcement | 0.566 |
| cTnI and delayed reinforcement and perfusion defects | 0.429 |
| cTnI and more cardiac damage than before | 0.416 |
| cTnI and cardioprotective drug | 0.446 |
| Cardioprotective drug and abnormal Q waves | 0.415 |
| cTnI and perfusion defects | 0.269 |
| Right axis deviation and more cardiac damage than before | 0.201 |
| Right axis deviation and cardioprotective drug | 0.258 |
| T-wave change and perfusion defects | 0.231 |
| Abnormal Q wave and delayed reinforcement | 0.210 |

Phi＞0.5 means strongly correlated, 0.3＜Phi＜0.5 means moderately correlated, Phi＜0.3 means weak correlated.

Table 6 The different degrees of elevated cTnI and progression of CMR

| The CMR | cTnI-N (n =130) | cTnI-H1(n =33) | cTnI-H2 (n =7) | cTnI-H3 (n =4) | *P* value |
| --- | --- | --- | --- | --- | --- |
| Normal | 51(39.23%)a | 2(6.06%)b | 0 | 0 | <0.001*** |
| More cardiac damage than before | 20(15.38%)a | 21(63.64%)b | 4(57.13%)b | 4(100%)b | <0.001*** |

a and b represent statistically significant differences between two groups. *** means *P*＜0.001

Table 7 Treatment and outcome of different degrees of elevated cTnI levels

|  | cTnI-H1’ (n=24) | | cTnI-H2’ (n=5) | cTnI-H3’ (n=4) |
| --- | --- | --- | --- | --- |
| Outcome | Treatment (n=17) | Non-treatment (n=7) | Treatment (n=5) | Treatment (n=4) |
| Decreased to normal | 1 (5.88%) | 2 (28.57%) |  |  |
| Repeated elevation | 6 (35.30%) | 2 (28.57%) | 1 (20%) | 2 (50%) |
| Continuous elevation | 10 (58.82%) | 3 (42.86%) | 4 (80%) | 2 (50%) |

cTnI-H1’ refered to the final follow-up of cTnI-H1 group, cTnI-H2’ refered to the final follow-up of cTnI-H2 group, cTnI-H3’ refered to the final follow-up of cTnI-H3 group

Figure 1 The flowchart of this study


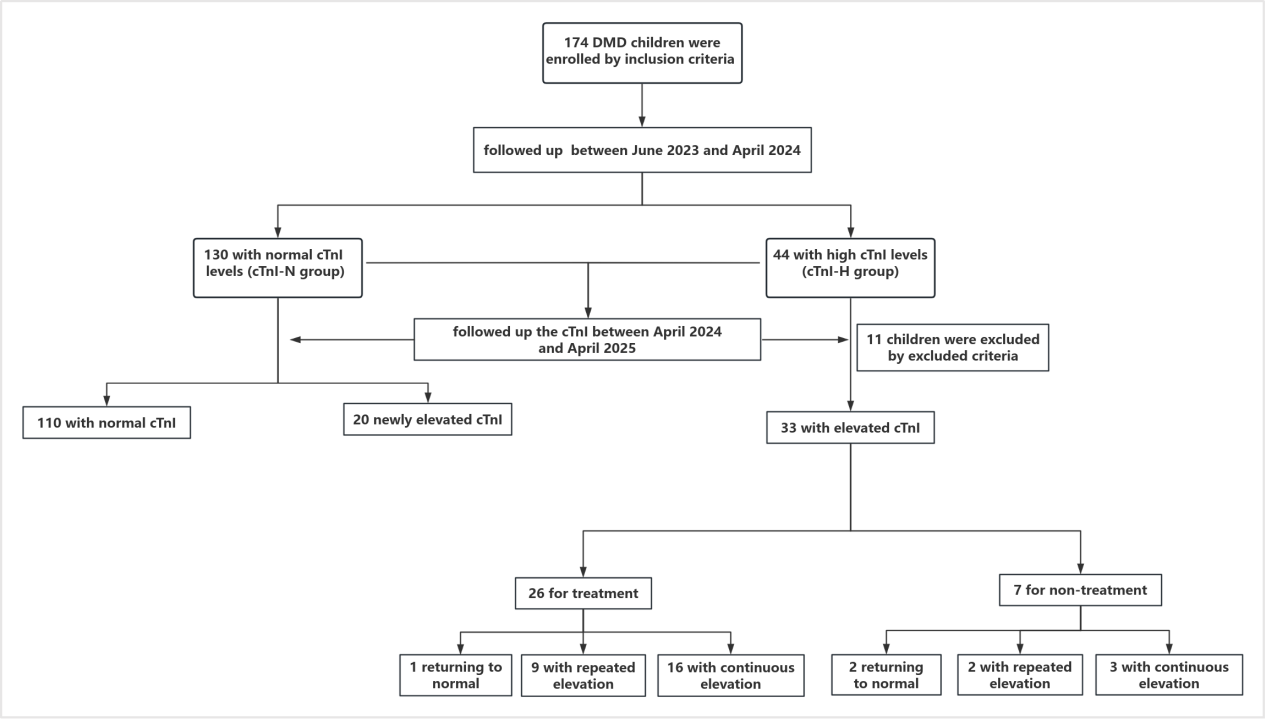


Figure 2 The distribution of elevated cTnl in the DMD population
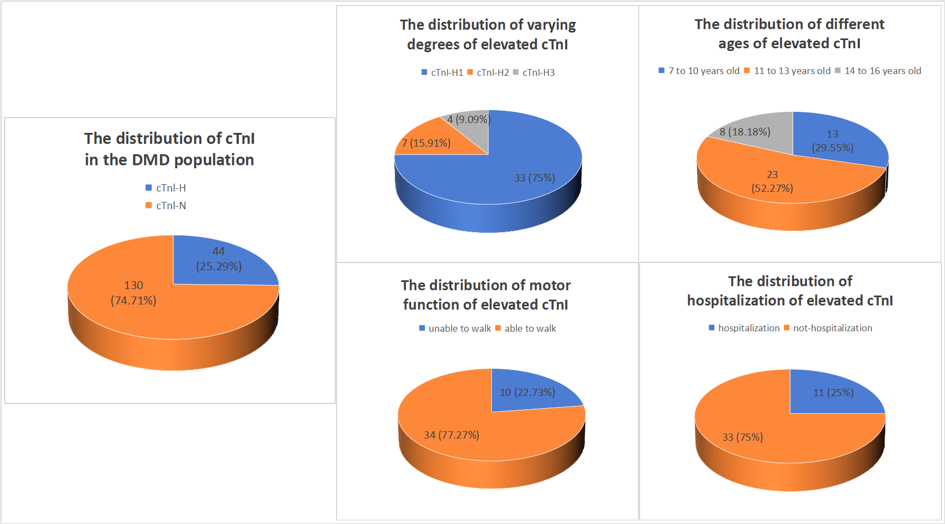


cTnI-N refers to the normal cTnI level, cTnI-H refers to the high cTnI level. cTnI-H1 refers to the elevation of cTnI was less than 10 times, cTnI-H2 refers to the elevation of cTnI was greater than 10 but less than 30 times, cTnI-H3 refers to the elevation of cTnI was greater than 30 times

Figure 3 The different degrees of elevated cTnI and progression of CMR
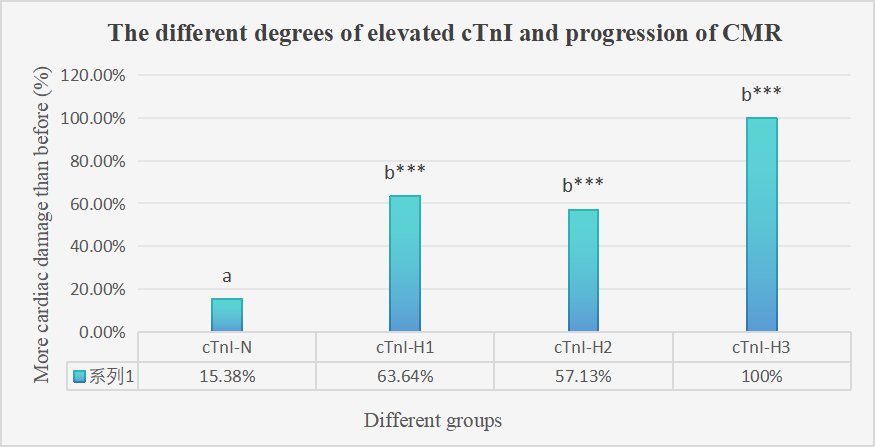


a and b represent statistically significant differences between two groups. *** means *P*＜0.001

Figure 4 The follow-up flowchart of different degrees of elevated cTnI
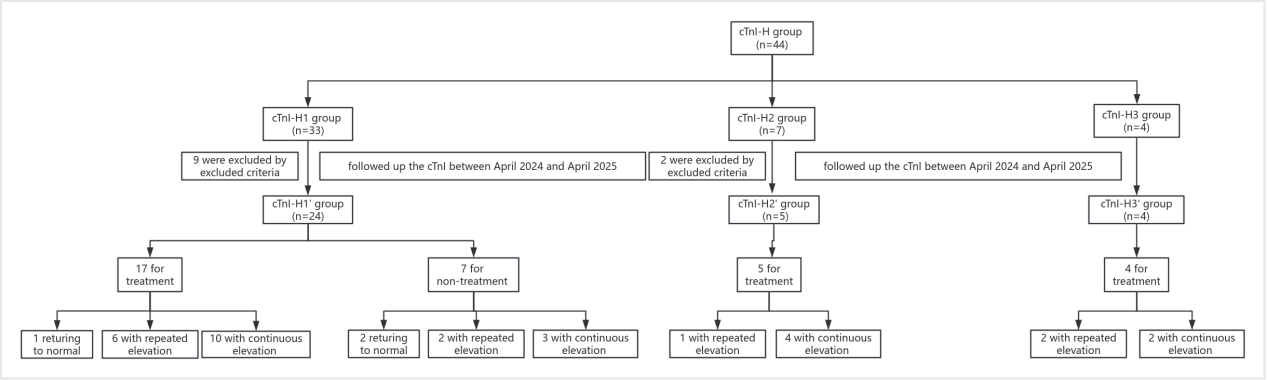


cTnI-N refers to the normal cTnI level, cTnI-H refers to the high cTnI level. cTnI-H1’ refered to the final follow-up of cTnI-H1 group, cTnI-H2’ refered to the final follow-up of cTnI-H2 group, cTnI-H3’ refered to the final follow-up of cTnI-H3 group

Figure 5 The duration of elevated cTnI and progression of CMR


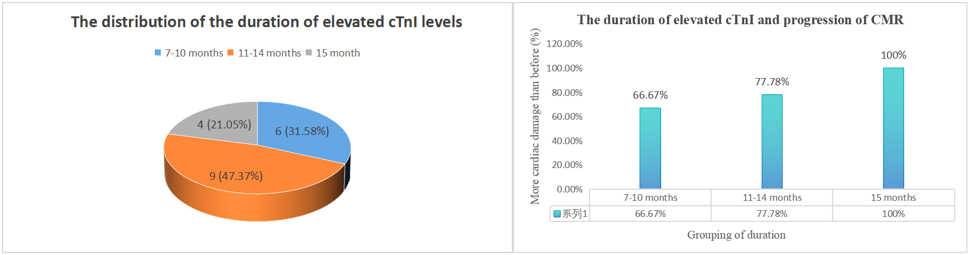

Supplement: Supplementary file 1 [file e980698f532a163eeee2ef24.docx]
